# Supplementary material for: Potent prion-like behaviors of pathogenic α-synuclein and evaluation of inactivation methods
Source: PubMed Central journal article supplement (PMC5907316; doi:10.1186/s40478-018-0532-2), 2018-04-18

**Fig S1.**

**A**

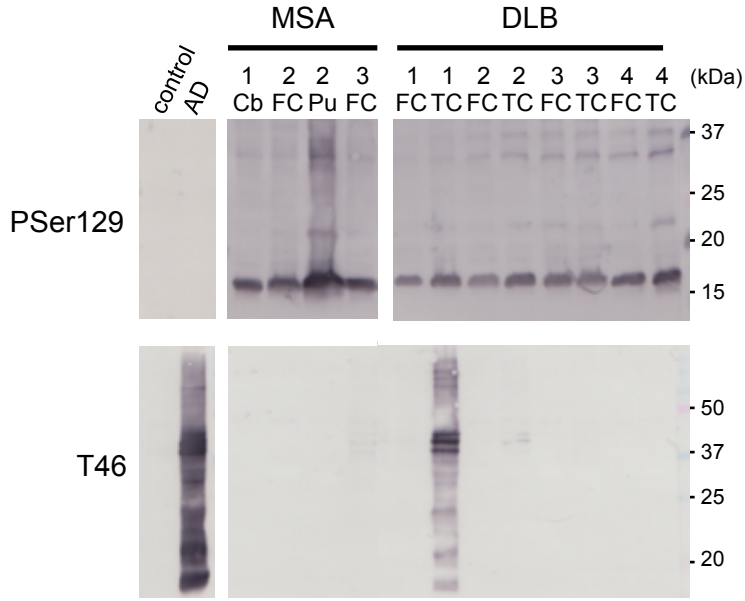

**B**

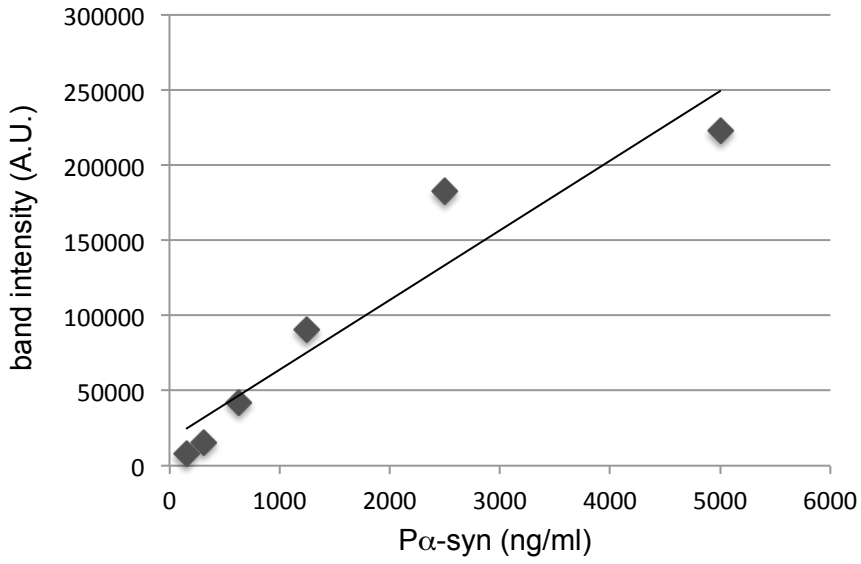

Supplement: 40478_2018_532_MOESM1_ESM.pdf [file 40478_2018_532_MOESM1_ESM.pdf]
