# Supplementary material for: Potent prion-like behaviors of pathogenic α-synuclein and evaluation of inactivation methods
Source: PubMed Central journal article supplement (PMC5907316; doi:10.1186/s40478-018-0532-2), 2018-04-18
Supplement: 40478_2018_532_MOESM2_ESM.pdf [file 40478_2018_532_MOESM2_ESM.pdf]

**Table S1.****A**

|          | P $\alpha$ -syn(ng/ul) |
|----------|------------------------|
| controll | not detected           |
| AD       | not detected           |
| MSA-1 Ce | 1.23                   |
| MSA-2 Fr | 3.58                   |
| MSA-2 Pu | 7.72                   |
| MSA-3 Fr | 1.66                   |
| DLB-1 Fr | 1.77                   |
| DLB-1 T  | 1.94                   |
| DLB-2 Fr | 1.24                   |
| DLB-2 T  | 1.44                   |
| DLB-3 Fr | 1.11                   |
| DLB-3 T  | 1.33                   |
| DLB-4 Fr | 1.84                   |
| DLB-4 T  | 1.87                   |

**B**

|          | P $\alpha$ -syn(ng/ul) |
|----------|------------------------|
| control  | not detected           |
| MSA-2 Pu | 43.6                   |
