# Supplementary material for: Potent prion-like behaviors of pathogenic α-synuclein and evaluation of inactivation methods
Source: PubMed Central journal article supplement (PMC5907316; doi:10.1186/s40478-018-0532-2), 2018-04-18
Supplement: 40478_2018_532_MOESM5_ESM.pdf [file 40478_2018_532_MOESM5_ESM.pdf]

**Table S2.****A**

| <b>fibril (<math>\mu\text{g}</math>)</b> | <b><i>N</i> (Total)</b> |
|------------------------------------------|-------------------------|
| 40                                       | 5                       |
| 10                                       | 5                       |
| 4                                        | 4                       |
| 2                                        | 4                       |
| 1                                        | 4                       |
| 0.1                                      | 3                       |
| 0.01 (10 ng)                             | 3                       |
| 0.001 (1 ng)                             | 4                       |
| 0.0001 (0.1 ng)                          | 4                       |
| 0.00001 (10 pg)                          | 4                       |

**B**

| <b>Treatment</b>     | <b><i>N</i> (Total)</b> |
|----------------------|-------------------------|
| monomer-saline       | 3                       |
| saline               | 4                       |
| 100°C 3min           | 4                       |
| 120°C 20min          | 4                       |
| 120°C 20min/0.1% SDS | 3                       |
| 134°C 20min          | 3                       |
| 134°C 20min/0.1% SDS | 3                       |

**C**

| <b>brain samples</b> | <b><i>N</i> (Total)</b> | <b>3M</b> | <b>9M</b>  |
|----------------------|-------------------------|-----------|------------|
| control              | 4                       | 2         | 2          |
| DLB                  | 4                       | 2         | 2          |
| MSA-2 Pu             | 5                       | 5         | not tested |
| MSA-2 Pu 100°C3min   | 5                       | 5         | not tested |
| MSA-2 Pu 134°C20min  | 4                       | 4         | not tested |
